# Supplementary material for: Poxviruses in Bats … so What?
Source: PubMed Central journal article supplement (PMC4014710; doi:10.3390/v6041564), 2014-04-03
Supplement: viruses-06-01564-s001.pdf [file viruses-06-01564-s001.pdf]

**Table S1.** Pairwise gaps (upper right) and amino acid identity (lower left) over a 100 aa alignment of *Poxviridae* RAP94-orthologues.

| Genome                                | Reference | 1   | 2   | 3  | 4  | 5  | 6  | 7  | 8  | 9  | 10 | 11 | 12  | 13  | 14 | 15  | 16  | 17  | 18 | 19 | 20 | 21 | 22 | 23 | 24 | 25 | 26 | 27 | 28 |
|---------------------------------------|-----------|-----|-----|----|----|----|----|----|----|----|----|----|-----|-----|----|-----|-----|-----|----|----|----|----|----|----|----|----|----|----|----|
| Sheeppox virus                        | 1         |     | 0   | 0  | 0  | 0  | 0  | 0  | 0  | 0  | 0  | 0  | 0   | 0   | 1  | 0   | 0   | 0   | 0  | 0  | 0  | 2  | 1  | 0  | 0  | 0  | 0  | 0  | 0  |
| Lumpy skin disease                    | 2         | 100 |     | 0  | 0  | 0  | 0  | 0  | 0  | 0  | 0  | 0  | 0   | 0   | 1  | 0   | 0   | 0   | 0  | 0  | 0  | 2  | 1  | 0  | 0  | 0  | 0  | 0  | 0  |
| Goatpox virus                         | 3         | 100 | 100 |    | 0  | 0  | 0  | 0  | 0  | 0  | 0  | 0  | 0   | 0   | 1  | 0   | 0   | 0   | 0  | 0  | 0  | 2  | 1  | 0  | 0  | 0  | 0  | 0  | 0  |
| Deerpox virus                         | 4         | 87  | 87  | 87 |    | 0  | 0  | 0  | 0  | 0  | 0  | 0  | 0   | 0   | 1  | 0   | 0   | 0   | 0  | 0  | 0  | 2  | 1  | 0  | 0  | 0  | 0  | 0  | 0  |
| Swinepox virus                        | 5         | 88  | 88  | 88 | 87 |    | 0  | 0  | 0  | 0  | 0  | 0  | 0   | 0   | 1  | 0   | 0   | 0   | 0  | 0  | 0  | 2  | 1  | 0  | 0  | 0  | 0  | 0  | 0  |
| Myxoma virus                          | 6         | 85  | 85  | 85 | 84 | 83 |    | 0  | 0  | 0  | 0  | 0  | 0   | 0   | 1  | 0   | 0   | 0   | 0  | 0  | 0  | 2  | 1  | 0  | 0  | 0  | 0  | 0  | 0  |
| Rabbit fibroma virus                  | 7         | 85  | 85  | 85 | 84 | 85 | 97 |    | 0  | 0  | 0  | 0  | 0   | 0   | 1  | 0   | 0   | 0   | 0  | 0  | 0  | 2  | 1  | 0  | 0  | 0  | 0  | 0  | 0  |
| Yaba like disease virus               | 8         | 80  | 80  | 80 | 80 | 83 | 83 | 86 |    | 0  | 0  | 0  | 0   | 0   | 1  | 0   | 0   | 0   | 0  | 0  | 0  | 2  | 1  | 0  | 0  | 0  | 0  | 0  | 0  |
| Tanapox virus                         | 9         | 79  | 79  | 79 | 79 | 82 | 82 | 85 | 99 |    | 0  | 0  | 0   | 0   | 1  | 0   | 0   | 0   | 0  | 0  | 0  | 2  | 1  | 0  | 0  | 0  | 0  | 0  | 0  |
| Yaba monkey tumor virus               | 10        | 77  | 77  | 77 | 80 | 82 | 81 | 83 | 94 | 93 |    | 0  | 0   | 0   | 1  | 0   | 0   | 0   | 0  | 0  | 0  | 2  | 1  | 0  | 0  | 0  | 0  | 0  | 0  |
| Cotia virus                           | 11        | 81  | 81  | 81 | 79 | 84 | 78 | 80 | 81 | 80 | 77 |    | 0   | 0   | 1  | 0   | 0   | 0   | 0  | 0  | 0  | 2  | 1  | 0  | 0  | 0  | 0  | 0  | 0  |
| Cowpox virus                          | 12        | 67  | 67  | 67 | 67 | 69 | 65 | 67 | 69 | 68 | 67 | 67 |     | 0   | 1  | 0   | 0   | 0   | 0  | 0  | 0  | 2  | 1  | 0  | 0  | 0  | 0  | 0  | 0  |
| Rabbitpox virus                       | 13        | 67  | 67  | 67 | 67 | 69 | 65 | 67 | 69 | 68 | 67 | 67 | 100 |     | 1  | 0   | 0   | 0   | 0  | 0  | 0  | 2  | 1  | 0  | 0  | 0  | 0  | 0  | 0  |
| Ectromelia virus                      | 14        | 66  | 66  | 66 | 66 | 68 | 64 | 66 | 68 | 67 | 66 | 66 | 98  | 98  |    | 1   | 1   | 1   | 1  | 1  | 1  | 3  | 2  | 1  | 1  | 1  | 1  | 1  | 1  |
| Taterapox virus                       | 15        | 67  | 67  | 67 | 67 | 69 | 65 | 67 | 69 | 68 | 67 | 67 | 100 | 100 | 98 |     | 0   | 0   | 0  | 0  | 0  | 2  | 1  | 0  | 0  | 0  | 0  | 0  | 0  |
| Camelpox virus                        | 16        | 67  | 67  | 67 | 67 | 69 | 65 | 67 | 69 | 68 | 67 | 67 | 100 | 100 | 98 | 100 |     | 0   | 0  | 0  | 0  | 2  | 1  | 0  | 0  | 0  | 0  | 0  | 0  |
| Monkeypox virus                       | 17        | 67  | 67  | 67 | 67 | 69 | 65 | 67 | 69 | 68 | 67 | 67 | 100 | 100 | 98 | 100 | 100 |     | 0  | 0  | 0  | 2  | 1  | 0  | 0  | 0  | 0  | 0  | 0  |
| Variola virus                         | 18        | 67  | 67  | 67 | 67 | 69 | 65 | 67 | 69 | 68 | 67 | 67 | 100 | 100 | 98 | 100 | 100 | 100 |    | 0  | 0  | 2  | 1  | 0  | 0  | 0  | 0  | 0  | 0  |
| Yoka poxvirus                         | 19        | 64  | 64  | 64 | 64 | 63 | 67 | 68 | 66 | 65 | 63 | 63 | 83  | 83  | 83 | 83  | 83  | 83  | 83 |    | 0  | 2  | 1  | 0  | 0  | 0  | 0  | 0  | 0  |
| Molluscum contagiosum                 | 20        | 67  | 67  | 67 | 67 | 70 | 68 | 68 | 66 | 65 | 65 | 67 | 71  | 71  | 70 | 71  | 71  | 71  | 71 | 68 |    | 2  | 1  | 0  | 0  | 0  | 0  | 0  | 0  |
| Fowlpox virus                         | 21        | 41  | 41  | 41 | 43 | 41 | 41 | 40 | 42 | 41 | 39 | 39 | 39  | 39  | 40 | 39  | 39  | 39  | 39 | 39 | 42 |    | 1  | 2  | 2  | 2  | 2  | 2  | 2  |
| Canarypox virus                       | 22        | 40  | 40  | 40 | 43 | 41 | 40 | 39 | 41 | 41 | 39 | 38 | 38  | 38  | 39 | 38  | 38  | 38  | 38 | 39 | 41 | 91 |    | 1  | 1  | 1  | 1  | 1  | 1  |
| Bovine papular stomatitis virus       | 23        | 58  | 58  | 58 | 61 | 59 | 60 | 59 | 57 | 56 | 59 | 62 | 53  | 53  | 53 | 53  | 53  | 53  | 53 | 56 | 64 | 37 | 37 |    | 0  | 0  | 0  | 0  | 0  |
| Orf virus                             | 24        | 56  | 56  | 56 | 60 | 59 | 60 | 60 | 57 | 56 | 59 | 61 | 54  | 54  | 54 | 54  | 54  | 54  | 54 | 55 | 65 | 38 | 38 | 87 |    | 0  | 0  | 0  | 0  |
| Nile crocodilepox virus               | 25        | 44  | 44  | 44 | 45 | 44 | 44 | 44 | 46 | 45 | 44 | 40 | 40  | 40  | 40 | 40  | 40  | 40  | 40 | 40 | 42 | 39 | 38 | 38 | 36 |    | 0  | 0  | 0  |
| Eidolon helvum poxvirus_1_th6839062   | 26        | 65  | 65  | 65 | 69 | 67 | 68 | 67 | 63 | 62 | 62 | 67 | 68  | 68  | 68 | 68  | 68  | 68  | 68 | 65 | 82 | 40 | 39 | 65 | 64 | 43 |    | 0  | 0  |
| Eptesipox virus                       | 27        | 73  | 73  | 73 | 72 | 73 | 73 | 73 | 72 | 71 | 67 | 71 | 70  | 70  | 69 | 70  | 70  | 70  | 70 | 67 | 67 | 40 | 40 | 56 | 56 | 42 | 62 |    | 0  |
| Amsacta moorei entomopoxvirus         | 28        | 9   | 9   | 9  | 8  | 8  | 9  | 9  | 9  | 10 | 7  | 8  | 5   | 5   | 5  | 5   | 5   | 5   | 5  | 6  | 4  | 5  | 4  | 6  | 5  | 6  | 5  | 9  |    |
| Melanoplus sanguinipes entomopoxvirus | 29        | 8   | 8   | 8  | 8  | 8  | 9  | 10 | 8  | 7  | 6  | 7  | 3   | 3   | 3  | 3   | 3   | 3   | 3  | 5  | 3  | 7  | 7  | 3  | 3  | 7  | 4  | 8  | 34 |

**Table S2.** Genbank accession numbers of viruses used in phylogenetic tree.

| <b>Name</b>                           | <b>Genbank Accession</b> |
|---------------------------------------|--------------------------|
| Amsacta moorei entomopoxvirus         | NP_64836                 |
| Bovine papular stomatitis virus       | NP_957969                |
| Lumpy skin disease                    | NP_150509                |
| Melanoplus sanguinipes entomopoxvirus | NP_48189                 |
| Nile crocodilepox virus               | YP_784294                |
| Rabbit fibroma virus                  | NP_51961                 |
| Yaba like disease virus               | NP_73460                 |
| Yaba monkey tumor virus               | NP_938330                |
| Camelpox virus                        | AAG37572                 |
| Canarypox virus                       | NP_955210                |
| Cotia virus                           | YP_5296279               |
| Cowpox virus                          | ADZ30718                 |
| Deerpox virus                         | YP_227459                |
| Ectromelia virus                      | NP_671604                |
| Fowlpox virus                         | AF198100_132             |
| Goatpox virus                         | YP_1293266               |
| Molluscum contagiosum                 | NP_44036                 |
| Monkeypox virus                       | AGF36998                 |
| Myxoma virus                          | NP_51786                 |
| Orf virus                             | NP_957837                |
| Rabbitpox virus                       | AAS49804                 |
| Sheeppox virus                        | NP_659647                |
| Swinepox virus                        | NP_570232                |
| Tanapox virus                         | YP_1497070               |
| Taterapox virus                       | YP_717411                |
| Variola virus                         | CAA47586                 |
| Yoka poxvirus                         | AEN03671                 |
